# Supplementary material for: Daily physical activity in subjects with newly diagnosed COPD
Source: PubMed Central journal article supplement — Thorax. 2013 Apr 20;68(10):962–3. doi: 10.1136/thoraxjnl-2013-203534 (PMC3786635; doi:10.1136/thoraxjnl-2013-203534), 2013-04-20

**Table 1.** Demographic and functional characteristics of study subjects.

| Variable                                                       | Smoking controls (n=65) | COPD (n=59)  |
|----------------------------------------------------------------|-------------------------|--------------|
| Age (years)                                                    | 62 ± 7                  | 63 ± 6       |
| Sex (% male)                                                   | 68                      | 75           |
| BMI                                                            | 27.0 ± 3.8              | 26.9 ± 4.2   |
| Packyears                                                      | 35 ± 22                 | 48 ± 22*     |
| Current smokers (%)                                            | 50                      | 49           |
| Educational level (% high education)                           | 54                      | 49           |
| Socio-economic status (% retired)                              | 62                      | 66           |
| Season of assessment                                           |                         |              |
| Winter (%)                                                     | 30                      | 31           |
| Spring (%)                                                     | 23                      | 14           |
| Summer (%)                                                     | 16                      | 17           |
| Autumn (%)                                                     | 31                      | 38           |
| FEV <sub>1</sub> (L)                                           | 3.04 ± 0.72             | 2.46 ± 0.65* |
| FEV <sub>1</sub> (% pred)                                      | 104 ± 15                | 85 ± 17*     |
| FVC (L)                                                        | 4.02 ± 0.88             | 4.03 ± 0.85  |
| FVC (% pred)                                                   | 110 ± 15                | 110 ± 15     |
| FEV <sub>1</sub> /FVC (%)                                      | 76 ± 4                  | 61 ± 7*      |
| GOLD stage I/II (n)                                            |                         | 39/20        |
| Group A (%)                                                    |                         | 100          |
| FRC/TLC <sub>p</sub> (%)                                       | 57 ± 10                 | 69 ± 14*     |
| RV/TLC (%)                                                     | 36 ± 7                  | 43 ± 7*      |
| IC/TLC (%)                                                     | 44 ± 7                  | 38 ± 7*      |
| T <sub>L,co</sub> (% pred)                                     | 87 ± 13                 | 78 ± 17*     |
| mMRC 0/mMRC 1 (n)                                              | 36/27                   | 28/30        |
| QF (% pred)                                                    | 92 ± 17                 | 98 ± 21      |
| 6MWD (m)                                                       | 609 ± 67                | 588 ± 86     |
| 6MWD (% pred)                                                  | 92 ± 9                  | 90 ± 11      |
| VO <sub>2</sub> peak (mL*min <sup>-1</sup> *kg <sup>-1</sup> ) | 28.2 ± 7.2              | 25.4 ± 5.1*  |
| VO <sub>2</sub> peak (% pred)                                  | 117 ± 33                | 107 ± 28*    |

BMI; Body Mass Index, FEV<sub>1</sub>; forced expiratory volume in 1 second, FVC; forced vital capacity, Group A (revised GOLD classification); mMRC 0-1, GOLD 1-2 (former GOLD classification) and 0-1 exacerbations per year, FRC; functional residual capacity, TLC<sub>(p)</sub>; (predicted) total lung capacity, RV; residual volume, TL<sub>CO</sub>; diffusion capacity of the lung for carbon monoxide, mMRC; modified Medical Research Council (no subject reported mMRC>1), QF; quadriceps force, 6MWD; six-minute walking distance, VO<sub>2</sub> peak; peak oxygen uptake. \*p<0.05 COPD versus smoking controls.

**Table 2.** Determinants of physical activity in subjects with COPD (n=59).

| <b>Variable</b>     | <b>Factor</b> | <b>SEM</b> | <b>Partial R<sup>2</sup></b> | <b>R<sup>2</sup></b> | <b>P</b> |
|---------------------|---------------|------------|------------------------------|----------------------|----------|
| <b><u>STEPS</u></b> |               |            |                              |                      |          |
| Intercept           | -9040         | 3160       |                              |                      |          |
| 6MWD                | 23            | 6          | 0.24                         | 0.24                 | 0.0002   |
| gender              | -3832         | 1149       | 0.11                         | 0.35                 | 0.0016   |
| T <sub>L,co</sub>   | 591           | 282        | 0.04                         | 0.39                 | 0.04     |
| Daylight time       | 4             | 2          | 0.02                         | 0.41                 | 0.12     |
| <b><u>MVPA</u></b>  |               |            |                              |                      |          |
| Intercept           | -177          | 56         |                              |                      |          |
| 6MWD                | 0.33          | 0.09       | 0.23                         | 0.23                 | 0.0006   |
| Daylight time       | 0.10          | 0.04       | 0.07                         | 0.30                 | 0.02     |
| <b><u>PAL</u></b>   |               |            |                              |                      |          |
| Intercept           | 0.70          | 0.19       |                              |                      |          |
| 6MWD                | 0.0008        | 0.0003     | 0.14                         | 0.14                 | 0.02     |
| gender              | -0.17         | 0.07       | 0.07                         | 0.21                 | 0.02     |
| T <sub>L,co</sub>   | 0.04          | 0.02       | 0.04                         | 0.25                 | 0.03     |
| Daylight time       | 0.0003        | 0.0001     | 0.05                         | 0.30                 | 0.05     |

6MWD is expressed in meters, gender (0=female, 1=male), T<sub>L,co</sub> in mmol\*min<sup>-1</sup>\*kPa and daylight time as minutes of daylight between sunrise and sunset.

# FIGURE LEGENDS

**Figure 1.** Flow chart of the included study subjects, recruited from the Nelson trial.

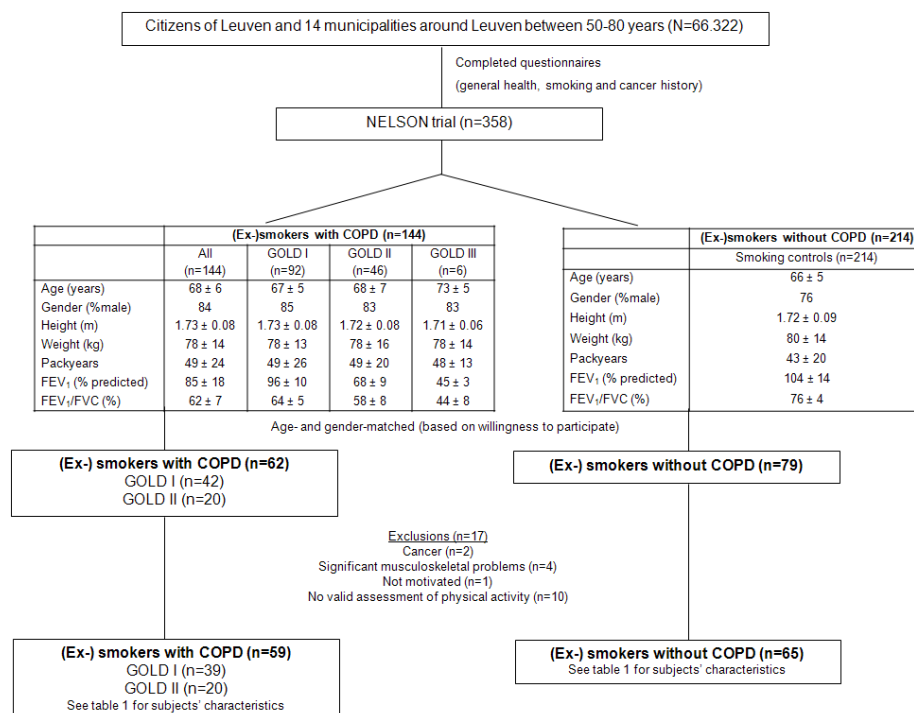

**Figure 2.** Daily physical activity in subjects with COPD and smoking controls with (mMRC1) and without (mMRC0) mild symptoms of dyspnea. \* $p < 0.05$  mMRC0 versus mMRC1.

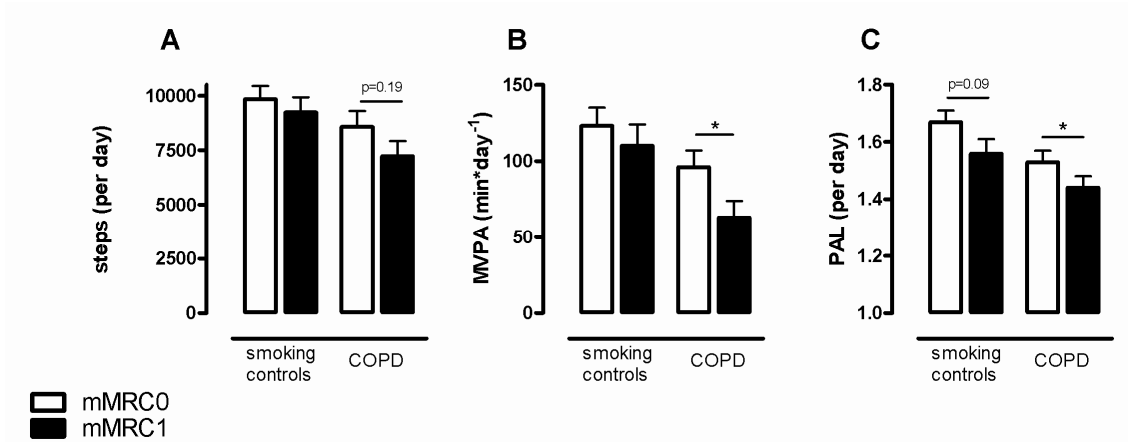

**Figure 3.** Daily physical activity levels (daily steps (A), daily time spent in moderate-to-vigorous intense physical activities (MVPA) (B) and daily physical activity level (PAL) (C)) and a reduced diffusion capacity of the lung for carbon monoxide ( $T_{L,CO}$ ) in subjects with and without COPD.  $T_{L,CO}$  below or equal to the median ( $7.7 \text{ mmol} \cdot \text{min}^{-1} \cdot \text{kPa}$  or 88% predicted for smoking controls and  $6.9 \text{ mmol} \cdot \text{min}^{-1} \cdot \text{kPa}$  or 80% predicted for COPD) was defined as a reduced  $T_{L,CO}$ . \* $p < 0.05$   $T_{L,CO} \geq$  median versus  $T_{L,CO} <$  median.

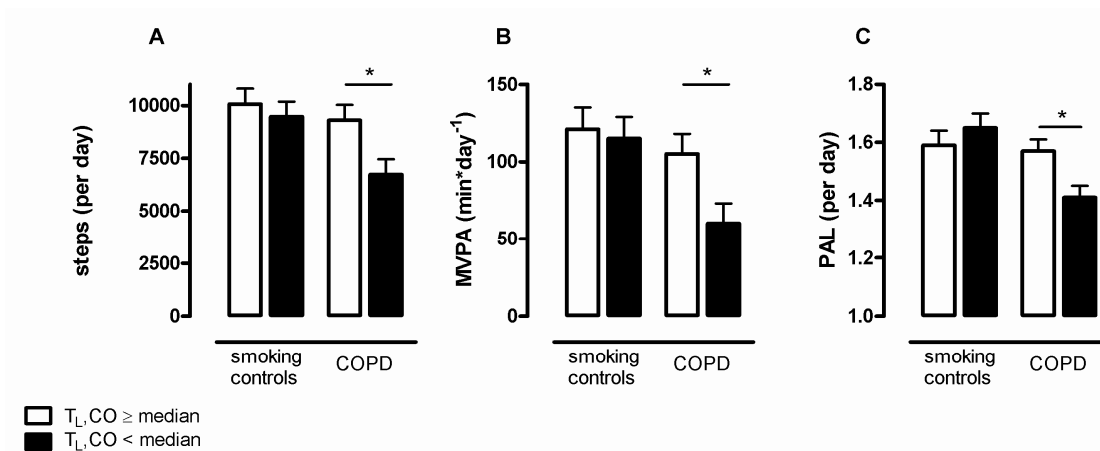

**Figure 4.** Daily physical activity levels (daily steps (A), daily time spent in moderate-to-vigorous intense physical activities (MVPA) (B) and daily physical activity level (PAL (C)) and a reduced six minute walking distance (6MWD) in subjects with and without COPD. 6MWD below or equal to the median (623 m or 93% predicted for smoking controls and 592 m or 90% predicted for COPD) was defined as a reduced 6MWD. \* $p < 0.05$  6MWD  $\geq$  median versus 6MWD  $<$  median.

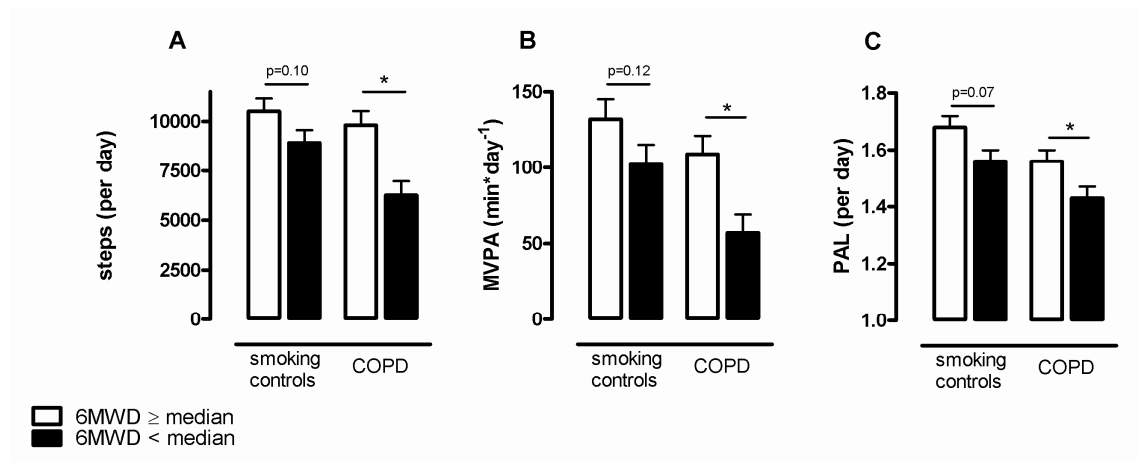

**Figure 5.** Daily physical activity levels (daily steps (A), daily time spent in moderate-to-vigorous intense physical activities (MVPA) (B) and daily physical activity level (PAL (C)) and a reduced peak oxygen consumption (peak  $\text{VO}_2$ ) in subjects with and without COPD. Peak  $\text{VO}_2$  below or equal to the median ( $2.23 \text{ L}\cdot\text{min}^{-1}$  or 116% predicted for smoking controls and  $2.00 \text{ L}\cdot\text{min}^{-1}$  or 102% predicted for COPD) was defined as a reduced peak  $\text{VO}_2$ . \* $p < 0.05$  peak  $\text{VO}_2 \geq$  median versus peak  $\text{VO}_2 <$  median.

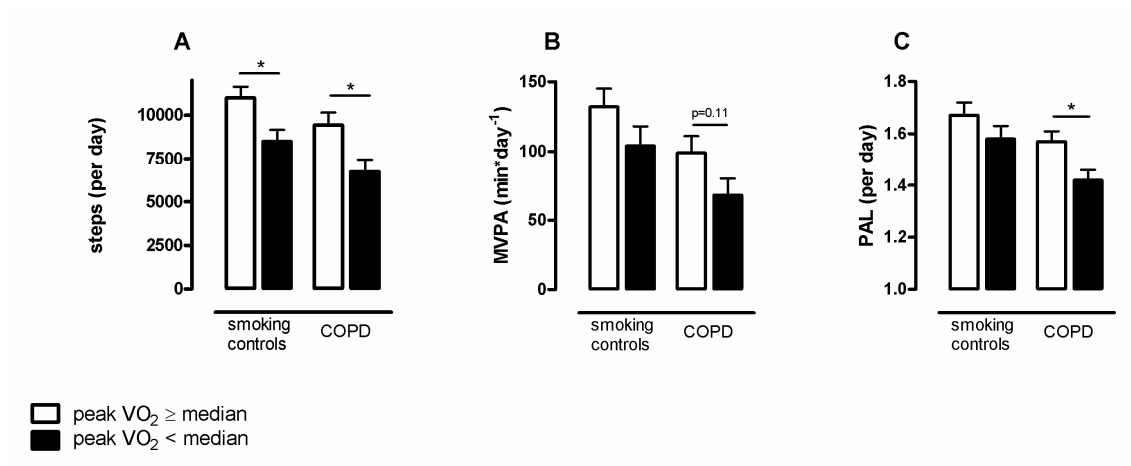

Supplement: thoraxjnl-2013-203534-s2.pdf [file thoraxjnl-2013-203534-s2.pdf]
